# Supplementary material
Source: publisher figshare collection journal article supplement (https://karger.figshare.com/ndownloader/files/26143358)
Supplement: Supplementary file 1 [file 26143358]

## Outcomes

### Primary Outcome

**Nightmare Distress Questionnaire (NDQ [5]).** The NDQ consists of 13 items rated on 5-point Likert scales. The score ranges from 13 to 65, and higher values indicate more distress. The NDQ has shown good internal consistency (Cronbach's  $\alpha = .83$  to  $\alpha = .88$ ) and medium correlations with nightmare frequency ( $r = .29$  to  $r = .45$  [5]). The questionnaire was translated into German by our workgroup; the translation was not published. Psychometric data are available for a different German version of the NDQ [33].

### Secondary Outcomes

**Nightmare Frequency Questionnaire (NFQ [34]).** For this questionnaire, the participant is asked to state the number of nights with nightmares and the number of nightmares in the last three months, given as zero or a number per year, month, or week. The NFQ has shown good psychometric values; the retest reliability was  $r = .9$  for nights with nightmares and  $r = .86$  for number of nightmares, and the two measures were highly correlated ( $r = .80$ ). Correlations with a prospective diary were  $r = .6$  for nights with nightmares and  $r = .63$  for number of nightmares [35]. We analyzed the number of nightmares.

**Nightmare Effects Survey (NES [34]).** The first item asks whether the person's life is generally affected by nightmares. The remaining eleven items ask the patient to rate areas in daily life on 5-point Likert scales regarding how much these areas are “adversely or negatively affected by nightmares”. The score ranges from 0 to 44, and higher values indicate more effects. The NES has shown good internal consistency (Cronbach's  $\alpha = .9$  [34]) and a correlation of  $r = .7$  with the NDQ [36].

**Self-Efficacy Questionnaire (SWE [37]).** This 10-item measure operationalizes the patient's sense of mastery with statements, such as “I am confident that I could deal efficiently with unexpected events”, rated on 4-point Likert scales. The score ranges from 10 to 40, with higher values indicating higher self-efficacy. Its internal consistency is high (Cronbach's  $\alpha = .8$  to  $.9$ ), it is unidimensional, and has shown positive relationships with optimism and job satisfaction and negative relationships with anxiety, depression, and stress [38].

**Symptom Checklist 90-Revised (SCL-90-R, German version [39]).** The SCL measures a wide variety of psychopathological symptoms. The Global Severity Index (GSI) was used, which ranges from 0 to 4, with higher values indicating more and/or more intense symptoms.

## **Additional Measures**

**Treatment Credibility and Expectancy.** We used six items from the reaction to treatment questionnaire [40] with 10-point Likert scales. Four items relate to credibility (logical treatment, confidence, recommendation to a friend, and successful treatment); the score ranges from 4 to 40, with higher values indicating higher credibility. Two items relate to the expected intensity of symptoms directly after the treatment and in one year's time. Expectancy ratings were reverse coded, which resulted in a score ranging from 2 to 20, with higher values indicating higher expected effects/lower symptom levels).

**Landeck Inventory for the Assessment of Sleep Disorders (LISST [41]).** This is a screening instrument for sleep disorders. We used one item that measures general dream recall with verbal categories that range from "never" to "nearly every morning".

Several other measures were obtained from the participants: therapist and patient ratings of depression and anxiety (used in the validation of the NFAQ and NES [42]) and a single item that measured nightmare intensity (excluded in favor of the validated NDQ and NES).

## Observed Data in the ITT Sample

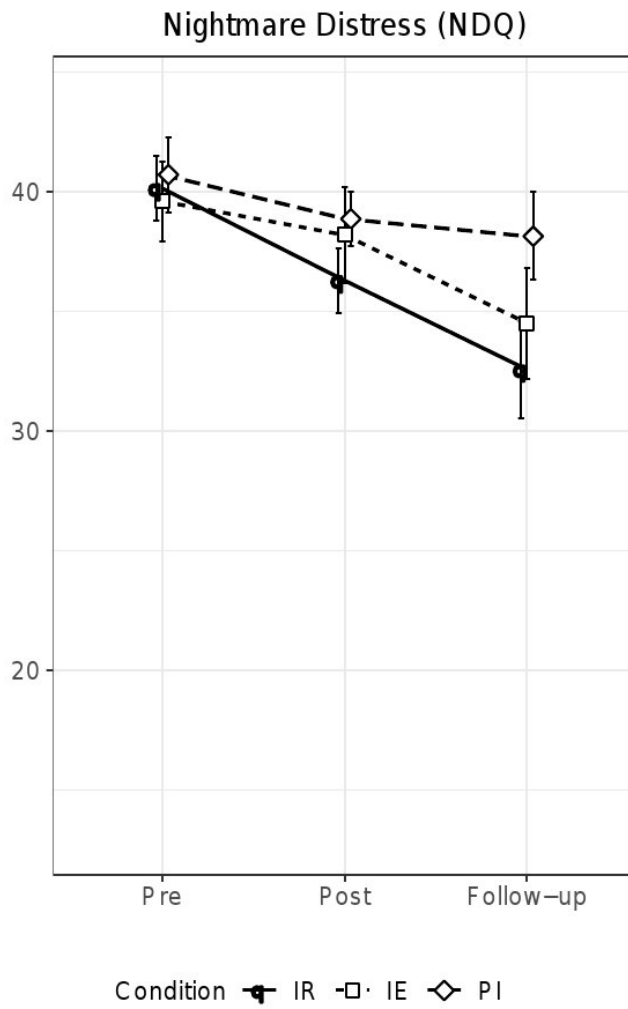

Fig. 2. Means for the main outcome with 95%-CIs. Intention-to-treat sample,  $N = 96$ .

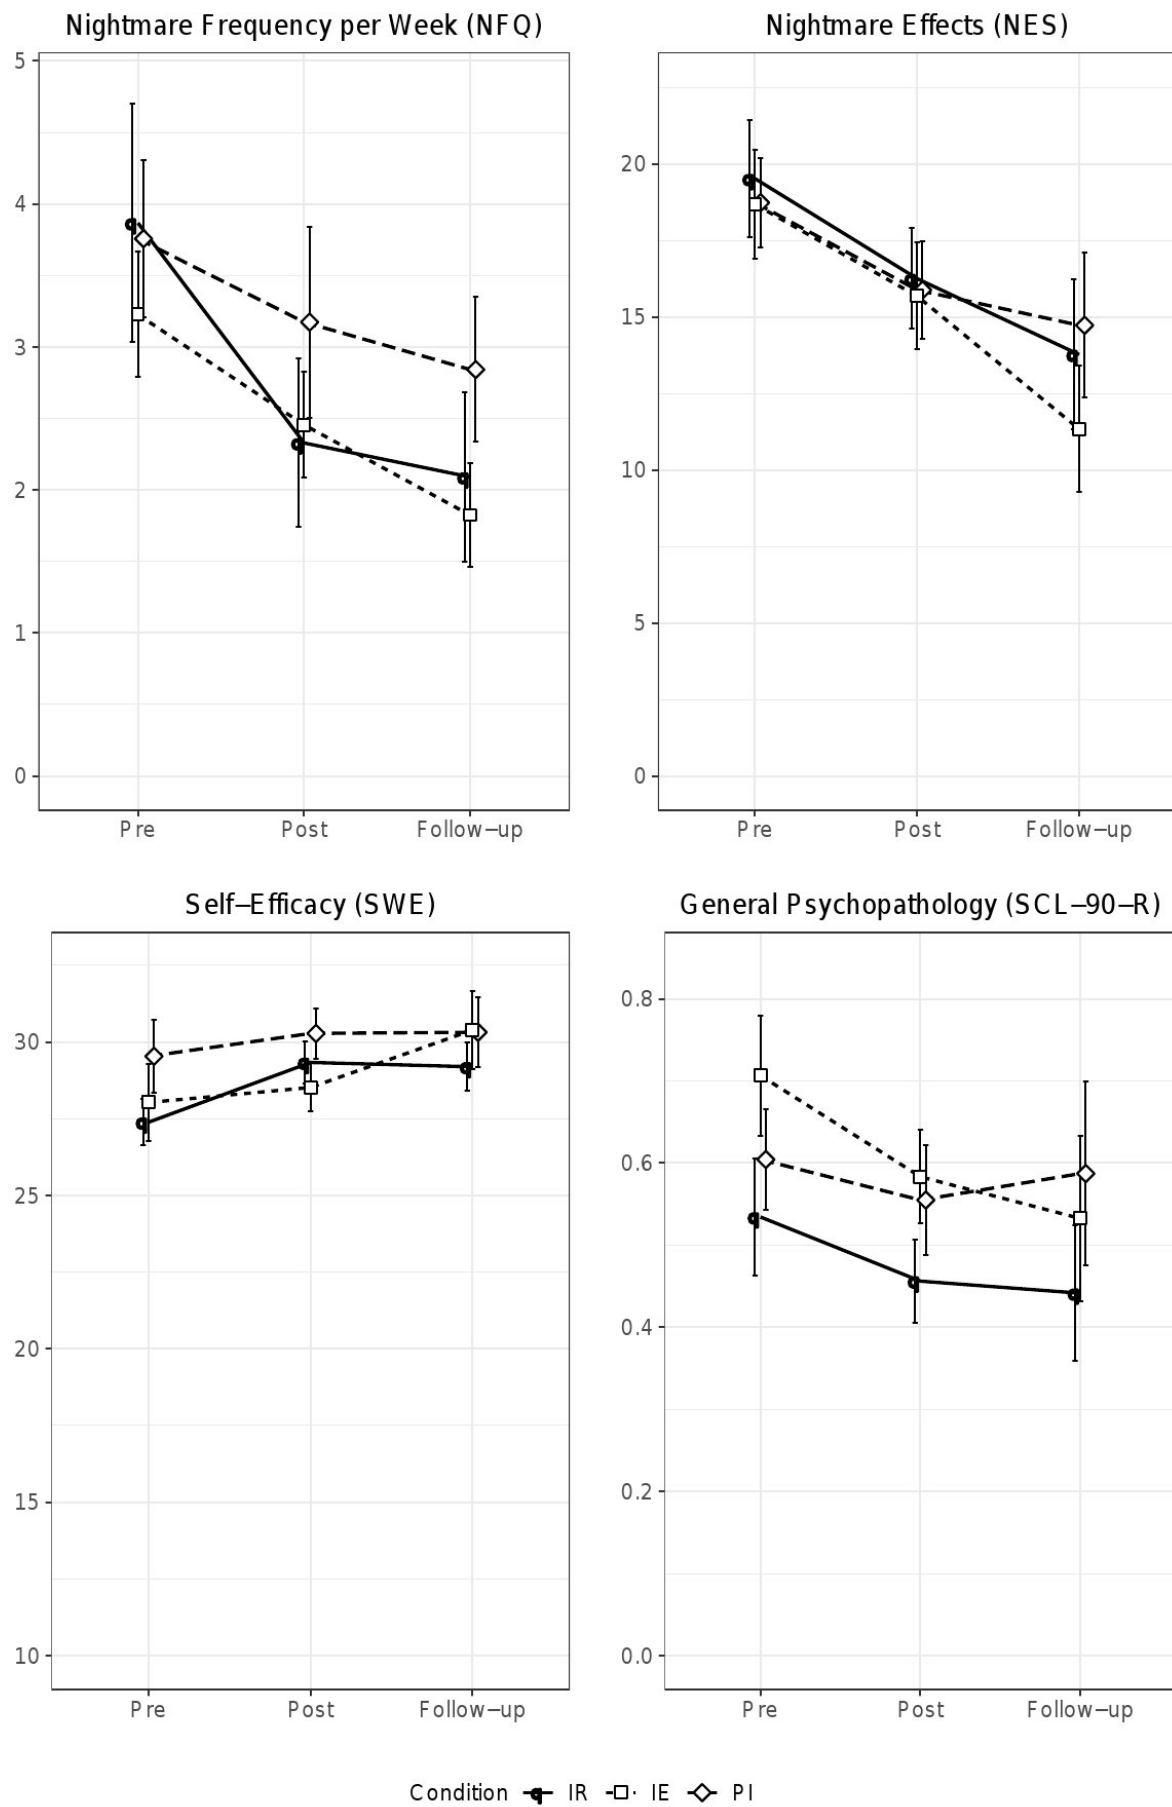

**Fig. 3.** Means for the secondary outcomes with 95%-CIs. Intention-to-treat sample,  $N = 96$ .

**Table A:** Time intervals between sessions and treatment duration

| Time interval                                                       | Condition                  |                            |                            | Total                      |
|---------------------------------------------------------------------|----------------------------|----------------------------|----------------------------|----------------------------|
|                                                                     | IR                         | IE                         | PI                         |                            |
| Screening to session 1,<br><i>M</i> ( <i>SD</i> , range, <i>n</i> ) | 56.28 (51.08, 0–239, 32)   | 66.41 (63.52, 0–249, 34)   | 60.90 (50.70, 0–152, 30)   | 61.31 (55.28, 0–249, 96)   |
| Session 1 to 2,<br><i>M</i> ( <i>SD</i> , range, <i>n</i> )         | 37.14 (30.48, 21–147, 29)  | 25.71 (8.73, 18–51, 31)    | 26.64 (8.15, 20–56, 28)    | 29.77 (19.32, 18–147, 88)  |
| Session 2 to 3,<br><i>M</i> ( <i>SD</i> , range, <i>n</i> )         | 30.07 (4.81, 21–44, 28)    | 33.07 (9.41, 27–77, 28)    | 33.15 (14.07, 23–81, 26)   | 32.07 (10.02, 21–81, 82)   |
| Session 3 to 4,<br><i>M</i> ( <i>SD</i> , range, <i>n</i> )         | 50.84 (13.30, 21–97, 25)   | 53.11 (13.82, 35–98, 28)   | 56.46 (12.87, 35–93, 24)   | 53.42 (13.38, 21–98, 77)   |
| Treatment duration,<br><i>M</i> ( <i>SD</i> , range, <i>n</i> )     | 115.60 (26.76, 91–196, 25) | 111.93 (19.15, 93–176, 28) | 114.08 (18.09, 90–168, 24) | 113.79 (21.40, 90–196, 77) |

*Note:* Durations measured in days, treatment duration = interval from session 1 to session 4. IE = Imaginal Exposure, IR = Imagery Rescripting, *M* = mean, PI = Positive Imagery, *SD* = standard deviation. Intention-to-treat sample, *N* = 96.

**Table B:** Types of comorbid and lifetime diagnoses

| Diagnoses                                  | No. of persons with<br>comorbid diagnosis | %   | No. of persons with<br>lifetime diagnosis | %   |
|--------------------------------------------|-------------------------------------------|-----|-------------------------------------------|-----|
| Substance-related disorders                |                                           |     | 3                                         | 3%  |
| Affective disorders                        | 41                                        | 43% | 14                                        | 15% |
| Anxiety disorders                          | 34                                        | 35% | 5                                         | 5%  |
| Obsessive-compulsive disorders             | 4                                         | 4%  |                                           |     |
| Adjustment disorders                       | 3                                         | 3%  | 5                                         | 5%  |
| Somatoform disorders                       | 4                                         | 4%  |                                           |     |
| Eating disorders                           | 5                                         | 5%  | 5                                         | 5%  |
| Sleeping disorders (other than nightmares) | 1                                         | 1%  | 1                                         | 1%  |
| Personality disorders                      | 9                                         | 9%  |                                           |     |
| Any disorder                               | 59                                        | 61% | 28                                        | 29% |

*Note:* Multiple diagnoses within one category and across categories were possible. Intention-to-treat sample,  $N = 96$ .

**Table C:** Comparison of the demographic and baseline data in treatment completers and non-completers

| Characteristic                                     | Non-completers    | Completers        | Total             | F     | p    |
|----------------------------------------------------|-------------------|-------------------|-------------------|-------|------|
| Age in years, <i>M (SD, n)</i>                     | 46.5 (11.92, 22)  | 40.04 (14.38, 74) | 41.52 (14.07, 96) | 3.677 | .058 |
| Duration of nm disorder in years, <i>M (SD, n)</i> | 14.29 (13.49, 21) | 15.81 (14.37, 73) | 15.47 (14.12, 94) | 0.188 | .666 |
| No. of comorbid diagnoses, <i>M (SD, n)</i>        | 1.23 (1.15, 22)   | 1.19 (1.36, 74)   | 1.20 (1.31, 96)   | 0.014 | .906 |
| No. of lifetime diagnoses, <i>M (SD, n)</i>        | 0.36 (0.66, 22)   | 0.39 (0.74, 74)   | 0.39 (0.72, 96)   | 0.026 | .872 |
| NDQ pre, <i>M (SD, n)</i>                          | 38.05 (6.47, 21)  | 40.71 (6.37, 74)  | 40.12 (6.45, 95)  | 2.820 | .096 |
| NFQ pre, <i>M (SD, n)</i>                          | 3.36 (3.18, 20)   | 3.68 (2.98, 73)   | 3.61 (3.01, 93)   | 0.174 | .677 |
| NES pre, <i>M (SD, n)</i>                          | 19.71 (8.29, 21)  | 18.76 (8.58, 74)  | 18.97 (8.48, 95)  | 0.207 | .650 |
| SWE pre, <i>M (SD, n)</i>                          | 28.24 (4.84, 21)  | 28.31 (5.38, 74)  | 28.29 (5.24, 95)  | 0.003 | .956 |
| SCL pre, <i>M (SD, n)</i>                          | 0.64 (0.34, 20)   | 0.61 (0.63, 73)   | 0.62 (0.58, 93)   | 0.028 | .868 |
| Gender, count (exp. count, std. residual)          |                   |                   |                   |       | .020 |
| female                                             | 13 (17.2, -1)     | 62 (57.8, 0.6)    | 75                |       |      |
| male                                               |                   |                   | 21                |       |      |
| Family status, count (exp. count, std. residual)   |                   |                   |                   |       | .619 |
| single                                             | 5 (6.0, -0.4)     | 21 (20.0, 0.2)    | 26                |       |      |
| partnership                                        | 4 (5.3, -0.6)     | 19 (17.7, 0.3)    | 23                |       |      |
| married                                            | 7 (6.6, 0.1)      | 22 (22.4, -0.1)   | 29                |       |      |
| divorced                                           | 3 (1.4, 1.4)      | 3 (4.6, -0.8)     | 6                 |       |      |
| widowed                                            | 0 (0.2, -0.5)     | 1 (0.8, 0.3)      | 1                 |       |      |

| Characteristic                                                       | Non-completers | Completers      | Total | F | p    |
|----------------------------------------------------------------------|----------------|-----------------|-------|---|------|
| Education, count (exp. count, std. residual)                         |                |                 |       |   | .065 |
| 5 years secondary education                                          | 3 (1.6, 1.1)   | 4 (5.4, -0.6)   | 7     |   |      |
| 6 years secondary education                                          | 6 (5.3, 0.3)   | 17 (17.7, -0.2) | 23    |   |      |
| certificate for university entrance                                  | 1 (5.5, -1.9)  | 23 (18.5, 1.0)  | 24    |   |      |
| university of applied science                                        | 3 (1.6, 1.1)   | 4 (5.4, -0.6)   | 7     |   |      |
| university                                                           | 6 (6.0, 0)     | 20 (20.0, 0)    | 26    |   |      |
| other                                                                | 0 (0.2, -0.5)  | 1 (0.8, 0.3)    | 1     |   |      |
| Psychotropic medication, count (exp. count, std. residual)           | 6 (6.6, -0.3)  | 23 (22.4, 0.1)  | 29    |   | .798 |
| Medication suspected to induce nm, count (exp. count, std. residual) | 6 (4.2, 0.9)   | 12 (13.8, -0.5) | 18    |   | .352 |

*Note:* exp. = expected, *M* = mean, nm = nightmare, NDQ = Nightmare Distress Questionnaire, NES = Nightmare Effects Survey, NFQ = Nightmare Frequency Questionnaire, SCL = Symptom Checklist 90, *SD* = standard deviation, std. = standardized, SWE = Self-Efficacy Questionnaire. Intention-to-treat sample, *N* = 96.



**Table D:** Descriptive data of the outcomes in the ITT sample (imputed data)

| Measure                                      | Condition              |                        |                        | Total                  |
|----------------------------------------------|------------------------|------------------------|------------------------|------------------------|
|                                              | IR                     | IE                     | PI                     |                        |
| NDQ pre, <i>M</i> ( <i>SD</i> , range)       | 40.13 (6.92, 26–52)    | 39.56 (6.05, 29–55)    | 40.70 (6.44, 29–50)    | 40.11 (6.42, 26–55)    |
| NDQ post, <i>M</i> ( <i>SD</i> , range)      | 36.53 (7.38, 21–53)    | 38.07 (5.96, 16–49)    | 38.86 (6.15, 27–55)    | 37.80 (6.52, 16–55)    |
| NDQ follow-up, <i>M</i> ( <i>SD</i> , range) | 33.65 (7.50, 18–47)    | 34.86 (7.54, 16–48)    | 37.85 (7.14, 20–53)    | 35.39 (7.53, 16–53)    |
| NFQ pre, <i>M</i> ( <i>SD</i> , range)       | 3.87 (3.41, 0.25–17)   | 3.19 (2.35, 0.75–10)   | 3.83 (3.15, 0.21–14)   | 3.62 (2.98, 0.21–17)   |
| NFQ post, <i>M</i> ( <i>SD</i> , range)      | 2.27 (1.92, 0.21–7)    | 2.43 (1.89, 0–7)       | 3.24 (2.78, 0.50–14)   | 2.63 (2.23, 0–14)      |
| NFQ follow-up, <i>M</i> ( <i>SD</i> , range) | 2.02 (1.76, 0.02–7)    | 1.88 (1.82, 0–7)       | 3.01 (2.62, 0.50–12)   | 2.28 (2.12, 0–12)      |
| NES pre, <i>M</i> ( <i>SD</i> , range)       | 19.63 (8.65, 4–35)     | 18.68 (7.88, 5–34)     | 18.73 (9.07, 4–36)     | 19.01 (8.45, 4–36)     |
| NES post, <i>M</i> ( <i>SD</i> , range)      | 16.54 (9.12, 2–32)     | 16.22 (7.78, 0–39)     | 16.40 (7.93, 1–33)     | 16.38 (8.21, 0–39)     |
| NES follow-up, <i>M</i> ( <i>SD</i> , range) | 14.63 (8.34, 2–33)     | 12.41 (8.86, 0–34)     | 15.10 (9.50, 1–42)     | 13.99 (8.88, 0–42)     |
| SWE pre, <i>M</i> ( <i>SD</i> , range)       | 27.44 (5.07, 17–38)    | 28.03 (5.62, 10–37)    | 29.53 (4.80, 14–37)    | 28.30 (5.21, 10–38)    |
| SWE post, <i>M</i> ( <i>SD</i> , range)      | 29.15 (4.01, 18–36)    | 28.46 (4.70, 19–39)    | 30.02 (3.90, 22–38)    | 29.18 (4.24, 18–39)    |
| SWE follow-up, <i>M</i> ( <i>SD</i> , range) | 29.27 (4.74, 17–40)    | 29.97 (5.68, 15–40)    | 30.11 (3.81, 20–40)    | 29.78 (4.80, 15–40)    |
| SCL pre, <i>M</i> ( <i>SD</i> , range)       | 0.53 (0.47, 0.01–2.19) | 0.71 (0.67, 0.04–2.69) | 0.60 (0.54, 0.01–2.13) | 0.61 (0.57, 0.01–2.69) |
| SCL post, <i>M</i> ( <i>SD</i> , range)      | 0.46 (0.48, 0.01–1.64) | 0.58 (0.59, 0.01–2.31) | 0.54 (0.53, 0.01–1.96) | 0.53 (0.53, 0.01–2.31) |
| SCL follow-up, <i>M</i> ( <i>SD</i> , range) | 0.44 (0.48, 0.02–1.69) | 0.53 (0.57, 0.01–2.11) | 0.54 (0.64, 0.06–2.75) | 0.50 (0.56, 0.01–2.75) |

*Note:* IE = Imaginal Exposure, IR = Imagery Rescripting, *M* = mean, NDQ = Nightmare Distress Questionnaire, NES = Nightmare Effects Survey, NFQ = Nightmare Frequency Questionnaire, nm = nightmare, PI = Positive Imagery, SCL = Symptom Checklist 90, *SD* = standard deviation, SWE = Self-Efficacy Questionnaire. Imputed data in the Intention-to-treat sample,  $n_{IR} = 32$ ,  $n_{IE} = 34$ ,  $n_{PI} = 30$ ,  $N_{Total} = 96$ .

**Table E:** Features and comparison of multilevel models for the imputed ITT data

| Model         | AIC     | BIC     | $\chi^2$ | df | p      |
|---------------|---------|---------|----------|----|--------|
| NDQ           |         |         |          |    |        |
| unconditional | 1884.76 | 1895.75 |          |    |        |
| Model 1       | 1840.96 | 1859.27 | 47.81    | 2  | < .001 |
| Model 2       | 1837.08 | 1873.71 | 13.87    | 5  | .016   |
| Model 3       | 1839.13 | 1883.09 | 1.95     | 2  | .377   |
| Model 4       | 1841.37 | 1899.98 | 5.76     | 4  | .218   |
| Model 5       | 1827.74 | 1915.65 | 29.63    | 8  | < .001 |
| Model 6       | 1842.26 | 2021.75 | 35.48    | 25 | .08    |
| NFQ           |         |         |          |    |        |
| unconditional | 1258.17 | 1269.16 |          |    |        |
| Model 1       | 1222.58 | 1240.89 | 39.59    | 2  | < .001 |
| Model 2       | 1158.59 | 1195.22 | 73.99    | 5  | < .001 |
| Model 3       | 1158.07 | 1202.03 | 4.52     | 2  | .104   |
| Model 4       | 1161.21 | 1219.82 | 4.86     | 4  | .302   |
| Model 5       | 1163.06 | 1250.97 | 14.15    | 8  | .078   |
| Model 6       | 1188.06 | 1367.55 | 25       | 25 | .462   |
| NES           |         |         |          |    |        |
| unconditional | 1960.38 | 1971.37 |          |    |        |
| Model 1       | 1916.48 | 1934.79 | 47.9     | 2  | < .001 |
| Model 2       | 1916.52 | 1953.15 | 9.96     | 5  | .077   |
| Model 3       | 1920.14 | 1964.1  | 0.38     | 2  | .826   |

| Model         | AIC     | BIC     | $\chi^2$ | df | p      |
|---------------|---------|---------|----------|----|--------|
| Model 4       | 1924.92 | 1983.53 | 3.23     | 4  | .521   |
| Model 5       | 1891.49 | 1979.41 | 49.42    | 8  | < .001 |
| Model 6       | 1913.46 | 2092.95 | 28.03    | 25 | .306   |
| SWE           |         |         |          |    |        |
| unconditional | 1598.77 | 1609.76 |          |    |        |
| Model 1       | 1588.6  | 1606.92 | 14.17    | 2  | .001   |
| Model 2       | 1548.51 | 1585.14 | 50.09    | 5  | < .001 |
| Model 3       | 1550.34 | 1594.3  | 2.17     | 2  | .338   |
| Model 4       | 1548.89 | 1607.5  | 9.45     | 4  | .051   |
| SCL           |         |         |          |    |        |
| unconditional | 206.63  | 217.62  |          |    |        |
| Model 1       | 195.18  | 213.5   | 15.45    | 2  | < .001 |
| Model 2       | 182.81  | 219.44  | 22.37    | 5  | < .001 |
| Model 3       | 185.88  | 229.84  | 0.93     | 2  | .629   |
| Model 4       | 191.69  | 250.3   | 2.19     | 4  | .701   |

*Note:* Effects were added in the following order: Model 0 unconditional, fixed time effects in Model 1, random time effects in Model 2, fixed condition effects in Model 3, time\*condition interaction in Model 4, additive covariates in Model 5, time\*covariates interaction in Model 6.  $\chi^2$ -tests compare each model with the immediately preceding one. AIC = Akaike Information Criterion, BIC = Bayesian Information Criterion, NDQ = Nightmare Distress Questionnaire, NES = Nightmare Effects Survey, NFQ = Nightmare Frequency Questionnaire, SCL = Symptom Checklist 90, SWE = Self-Efficacy Questionnaire. Imputed data of the ITT sample, 288 observations (3 time levels nested in 96 participants).

**Table F:** Fixed and random effects in the multilevel models for the imputed ITT data

| Model and predictor               | Fixed effect |         |           |              |        |         |       |       |        | Random effect |
|-----------------------------------|--------------|---------|-----------|--------------|--------|---------|-------|-------|--------|---------------|
|                                   | Beta         | Beta SE | Std. Beta | Std. Beta SE | CI low | CI high | t     | df    | p      |               |
| NDQ Model 2                       |              |         |           |              |        |         |       |       |        |               |
| Intercept                         | 40.11        | 0.66    | 0         | 0            | 38.84  | 41.4    | 61.19 | 95    | < .001 | 28.55         |
| Time (post)                       | -2.3         | 0.56    | -0.15     | 0.04         | -3.42  | -1.24   | -4.09 | 95    | < .001 | 5.10          |
| Time (follow-up)                  | -4.71        | 0.74    | -0.31     | 0.05         | -6.14  | -3.29   | -6.37 | 95    | < .001 | 27.18         |
| Residual                          |              |         |           |              |        |         |       |       |        | 12.68         |
| NDQ Model 5                       |              |         |           |              |        |         |       |       |        |               |
| Intercept                         | 40.2         | 0.79    | 0         | 0            | 38.64  | 41.76   | 50.86 | 98.61 | < .001 | 24.05         |
| Time (post)                       | -2.31        | 0.56    | -0.15     | 0.04         | -3.42  | -1.2    | -4.11 | 93    | < .001 | 4.67          |
| Time (follow-up)                  | -4.68        | 0.73    | -0.31     | 0.05         | -6.11  | -3.27   | -6.38 | 93    | < .001 | 25.91         |
| Residual                          |              |         |           |              |        |         |       |       |        | 12.78         |
| Condition (IR+IE vs PI)           | -1.05        | 1.36    | -0.07     | 0.09         | -3.77  | 1.56    | -0.77 | 87.49 | .443   |               |
| Condition (IR vs IE)              | -0.89        | 1.52    | -0.05     | 0.09         | -3.88  | 2.08    | -0.58 | 87.21 | .56    |               |
| Gender (male)                     | -1.87        | 1.43    | -0.11     | 0.08         | -4.76  | 1.06    | -1.31 | 85    | .195   |               |
| Age                               | -1.02        | 0.65    | -0.14     | 0.09         | -2.33  | 0.32    | -1.55 | 85    | .124   |               |
| Duration of nm disorder           | 0.71         | 0.58    | 0.1       | 0.08         | -0.46  | 1.88    | 1.23  | 85    | .221   |               |
| Psychotropic medication           | 1.82         | 1.65    | 0.12      | 0.11         | -1.52  | 5.12    | 1.1   | 85    | .275   |               |
| Medication suspected to induce nm | -1.04        | 1.91    | -0.06     | 0.11         | -4.87  | 2.9     | -0.55 | 85    | .587   |               |
| SWE baseline                      | -0.79        | 0.61    | -0.11     | 0.09         | -2.01  | 0.47    | -1.31 | 85    | .194   |               |
| Dream recall baseline             | 1.09         | 0.54    | 0.15      | 0.08         | -0.04  | 2.21    | 2.01  | 85    | .047   |               |
| SCL baseline                      | 2.05         | 0.64    | 0.29      | 0.09         | 0.76   | 3.36    | 3.19  | 85    | .002   |               |

| Model and predictor                      | Fixed effect |         |           |              |        |         |       |        |        | Random effect |
|------------------------------------------|--------------|---------|-----------|--------------|--------|---------|-------|--------|--------|---------------|
|                                          | Beta         | Beta SE | Std. Beta | Std. Beta SE | CI low | CI high | t     | df     | p      |               |
| Time (post)*Condition (IR+IE vs PI)      | -0.7         | 1.21    | -0.03     | 0.05         | -3.1   | 1.71    | -0.58 | 93     | .567   |               |
| Time (follow-up)*Condition (IR+IE vs PI) | -2.74        | 1.58    | -0.1      | 0.06         | -5.8   | 0.4     | -1.73 | 93     | .086   |               |
| Time (post)*Condition (IR vs IE)         | 2.11         | 1.35    | 0.07      | 0.05         | -0.54  | 4.76    | 1.56  | 93     | .123   |               |
| Time (follow-up)*Condition (IR vs IE)    | 1.78         | 1.77    | 0.06      | 0.06         | -1.62  | 5.27    | 1.01  | 93     | .316   |               |
| NFQ Model 2                              |              |         |           |              |        |         |       |        |        |               |
| Intercept                                | 3.62         | 0.3     | 0         | 0            | 3.01   | 4.22    | 11.91 | 95     | < .001 | 8.25          |
| Time (post)                              | -0.99        | 0.24    | -0.18     | 0.05         | -1.45  | -0.52   | -4.08 | 95     | < .001 | 4.37          |
| Time (follow-up)                         | -1.34        | 0.25    | -0.25     | 0.05         | -1.81  | -0.86   | -5.41 | 95     | < .001 | 4.63          |
| Residual                                 |              |         |           |              |        |         |       |        |        | 0.62          |
| NES Model 1                              |              |         |           |              |        |         |       |        |        |               |
| Intercept                                | 19.01        | 0.87    | 0         | 0            | 17.33  | 20.75   | 21.87 | 145.98 | < .001 |               |
| Time (post)                              | -2.63        | 0.68    | -0.14     | 0.04         | -3.98  | -1.28   | -3.84 | 190    | < .001 |               |
| Time (follow-up)                         | -5.02        | 0.68    | -0.27     | 0.04         | -6.37  | -3.68   | -7.34 | 190    | < .001 |               |
| NES Model 5                              |              |         |           |              |        |         |       |        |        |               |
| Intercept                                | 17.41        | 0.91    | 0         | 0            | 15.54  | 19.31   | 19.14 | 92.16  | < .001 | 30.9          |
| Time (post)                              | -2.62        | 0.62    | -0.14     | 0.03         | -3.82  | -1.45   | -4.25 | 93     | < .001 | 6.58          |
| Time (follow-up)                         | -4.97        | 0.78    | -0.27     | 0.04         | -6.49  | -3.44   | -6.34 | 93     | < .001 | 28.8          |
| Residual                                 |              |         |           |              |        |         |       |        |        | 14.96         |
| Condition (IR+IE vs PI)                  | 0.43         | 1.53    | 0.02      | 0.08         | -2.74  | 3.17    | 0.28  | 85.32  | .781   |               |
| Condition (IR vs IE)                     | -1.93        | 1.7     | -0.09     | 0.08         | -5.31  | 1.47    | -1.13 | 85.13  | .26    |               |
| Gender (male)                            | 1.98         | 1.73    | 0.09      | 0.08         | -1.67  | 5.79    | 1.15  | 85     | .254   |               |

| Model and predictor                      | Fixed effect |         |           |              |        |         |       |    |        | Random effect |
|------------------------------------------|--------------|---------|-----------|--------------|--------|---------|-------|----|--------|---------------|
|                                          | Beta         | Beta SE | Std. Beta | Std. Beta SE | CI low | CI high | t     | df | p      |               |
| Age                                      | -0.18        | 0.79    | -0.02     | 0.09         | -1.92  | 1.59    | -0.23 | 85 | .819   |               |
| Duration of nm disorder                  | -0.12        | 0.7     | -0.01     | 0.08         | -1.59  | 1.43    | -0.17 | 85 | .869   |               |
| Psychotropic medication                  | 4.26         | 1.99    | 0.22      | 0.1          | -0.13  | 8.65    | 2.14  | 85 | .035   |               |
| Medication suspected to induce nm        | -0.56        | 2.3     | -0.03     | 0.1          | -5.43  | 4.33    | -0.24 | 85 | .807   |               |
| SWE baseline                             | -1.11        | 0.73    | -0.13     | 0.08         | -2.65  | 0.4     | -1.51 | 85 | .134   |               |
| Dream recall baseline                    | 1.49         | 0.66    | 0.17      | 0.08         | 0.07   | 2.93    | 2.27  | 85 | .026   |               |
| SCL baseline                             | 3.2          | 0.77    | 0.37      | 0.09         | 1.52   | 4.81    | 4.14  | 85 | < .001 |               |
| Time (post)*Condition (IR+IE vs PI)      | -0.43        | 1.33    | -0.01     | 0.04         | -3.04  | 2.26    | -0.32 | 93 | .747   |               |
| Time (follow-up)*Condition (IR+IE vs PI) | -2           | 1.69    | -0.06     | 0.05         | -5.25  | 1.43    | -1.18 | 93 | .24    |               |
| Time (post)*Condition (IR vs IE)         | 0.63         | 1.49    | 0.02      | 0.04         | -2.34  | 3.57    | 0.42  | 93 | .675   |               |
| Time (follow-up)*Condition (IR vs IE)    | -1.27        | 1.89    | -0.03     | 0.05         | -5.06  | 2.42    | -0.67 | 93 | .502   |               |
| SWE Model 2                              |              |         |           |              |        |         |       |    |        |               |
| Intercept                                | 28.3         | 0.53    | 0         | 0            | 27.25  | 29.35   | 53.23 | 95 | < .001 | 24.46         |
| Time (post)                              | 0.87         | 0.41    | 0.09      | 0.04         | 0.07   | 1.67    | 2.15  | 95 | .034   | 10.46         |
| Time (follow-up)                         | 1.48         | 0.48    | 0.15      | 0.05         | 0.55   | 2.42    | 3.11  | 95 | .002   | 16.48         |
| Residual                                 |              |         |           |              |        |         |       |    |        | 2.68          |
| SWE Model 4                              |              |         |           |              |        |         |       |    |        |               |
| Intercept                                | 28.33        | 0.53    | 0         | 0            | 27.28  | 29.38   | 53.41 | 93 | < .001 | 24.46         |
| Time (post)                              | 0.88         | 0.41    | 0.09      | 0.04         | 0.07   | 1.66    | 2.16  | 93 | .034   | 10.82         |
| Time (follow-up)                         | 1.45         | 0.48    | 0.14      | 0.05         | 0.52   | 2.38    | 3.04  | 93 | .003   | 16.94         |
| Residual                                 |              |         |           |              |        |         |       |    |        | 2.49          |

| Model and predictor                      | Fixed effect |         |           |              |        |         |       |    |        | Random effect |
|------------------------------------------|--------------|---------|-----------|--------------|--------|---------|-------|----|--------|---------------|
|                                          | Beta         | Beta SE | Std. Beta | Std. Beta SE | CI low | CI high | t     | df | p      |               |
| Condition (IR+IE vs PI)                  | -1.8         | 1.14    | -0.17     | 0.11         | -4.09  | 0.44    | -1.57 | 93 | .119   |               |
| Condition (IR vs IE)                     | 0.59         | 1.28    | 0.05      | 0.11         | -1.88  | 3.12    | 0.46  | 93 | .644   |               |
| Time (post)*Condition (IR+IE vs PI)      | 0.59         | 0.88    | 0.03      | 0.05         | -1.09  | 2.3     | 0.67  | 93 | .505   |               |
| Time (follow-up)*Condition (IR+IE vs PI) | 1.31         | 1.03    | 0.07      | 0.06         | -0.71  | 3.37    | 1.27  | 93 | .208   |               |
| Time (post)*Condition (IR vs IE)         | -1.28        | 0.98    | -0.06     | 0.05         | -3.24  | 0.6     | -1.31 | 93 | .193   |               |
| Time (follow-up)*Condition (IR vs IE)    | 0.11         | 1.15    | 0.01      | 0.06         | -2.19  | 2.32    | 0.09  | 93 | .927   |               |
| SCL Model 2                              |              |         |           |              |        |         |       |    |        |               |
| Intercept                                | 0.61         | 0.06    | 0         | 0            | 0.5    | 0.73    | 10.56 | 95 | < .001 | 0.3           |
| Time (post)                              | -0.09        | 0.03    | -0.07     | 0.02         | -0.14  | -0.03   | -3.25 | 95 | .002   | 0.02          |
| Time (follow-up)                         | -0.11        | 0.04    | -0.09     | 0.03         | -0.18  | -0.04   | -3.16 | 95 | .002   | 0.08          |
| Residual                                 |              |         |           |              |        |         |       |    |        | 0.02          |

*Note:* Effects are reported for the models that best fit the data. *CI* = Confidence Interval, *IE* = Imaginal Exposure, *IR* = Imagery Rescripting, *NDQ* = Nightmare Distress Questionnaire, *NES* = Nightmare Effects Survey, *NFQ* = Nightmare Frequency Questionnaire, *PI* = Positive Imagery, *SCL* = Symptom Checklist 90, *SE* = standard error, *SWE* = Self-Efficacy Questionnaire. Imputed data of the ITT sample, 288 observations (3 time levels nested in 96 participants).

**Table G:** Clinical significance, absolute scores

| Criterion for clinical significance             | Condition  |            |            | Total      |
|-------------------------------------------------|------------|------------|------------|------------|
|                                                 | IR         | IE         | PI         |            |
| Number of nightmares at post, <i>n</i> (%)      |            |            |            |            |
| None                                            | 0 (0.0%)   | 2 (7.1%)   | 0 (0.0%)   | 2 (2.5%)   |
| < 1 / week                                      | 9 (32.1%)  | 8 (28.6%)  | 3 (13.0%)  | 20 (25.3%) |
| ≥ 1 / week                                      | 19 (67.9%) | 18 (64.3%) | 20 (87.0%) | 57 (72.2%) |
| Number of nightmares at follow-up, <i>n</i> (%) |            |            |            |            |
| None                                            | 0 (0.0%)   | 3 (11.1%)  | 0 (0.0%)   | 3 (4.2%)   |
| < 1 / week                                      | 8 (32.0%)  | 11 (40.7%) | 5 (26.3%)  | 24 (33.8%) |
| ≥ 1 / week                                      | 17 (68.0%) | 13 (48.1%) | 14 (73.7%) | 44 (62.0%) |
| Psychopathology pre, <i>n</i> (%)               |            |            |            |            |
| Low                                             | 1 (3.2%)   | 1 (2.9%)   | 1 (3.6%)   | 3 (3.2%)   |
| Medium                                          | 23 (74.2%) | 25 (73.5%) | 21 (75.0%) | 69 (74.2%) |
| High                                            | 7 (22.6%)  | 8 (23.5%)  | 6 (21.4%)  | 21 (22.6%) |
| Psychopathology post, <i>n</i> (%)              |            |            |            |            |
| Low                                             | 3 (11.5%)  | 2 (7.1%)   | 1 (4.0%)   | 6 (7.6%)   |
| Medium                                          | 17 (65.4%) | 21 (75.0%) | 19 (76.0%) | 57 (72.2%) |
| High                                            | 6 (23.1%)  | 5 (17.9%)  | 5 (20.0%)  | 16 (20.3%) |
| Psychopathology follow-up, <i>n</i> (%)         |            |            |            |            |
| Low                                             | 4 (16.0%)  | 6 (21.4%)  | 0 (0.0%)   | 10 (13.3%) |
| Medium                                          | 16 (64.0%) | 16 (57.1%) | 17 (77.3%) | 49 (65.3%) |
| High                                            | 5 (20.0%)  | 6 (21.4%)  | 5 (22.7%)  | 16 (21.3%) |

*Note:* Psychopathology judged by T-norms of the SCL, low:  $T \leq 37$ , medium:  $37 < T < 63$ , high:  $T \geq 63$ . IE = Imaginal Exposure, IR = Imagery Rescripting, PI = Positive Imagery. Intention-to-treat sample,  $N = 96$ . Percentages refer to the number of observed values per condition and time.



**Table H:** Clinical significance, relative scores

| Change Score                             | Condition               |                           |                         | Total                   |
|------------------------------------------|-------------------------|---------------------------|-------------------------|-------------------------|
|                                          | IR                      | IE                        | PI                      |                         |
| NDQ pre to post                          |                         |                           |                         |                         |
| <i>M</i> ( <i>SD</i> , range, <i>N</i> ) | -3.33 (4.24, -15–2, 28) | -2.46 (6.83, -24–8, 28)   | -2.57 (5.13, -15–7, 25) | -2.80 (5.46, -24–8, 81) |
| Improved, <i>n</i> (%)                   | 5 (17.9%)               | 7 (25.0%)                 | 4 (16.0%)               | 16 (19.8%)              |
| Unchanged, <i>n</i> (%)                  | 23 (82.1%)              | 20 (71.4%)                | 20 (80.0%)              | 63 (77.8%)              |
| Worsened, <i>n</i> (%)                   | 0 (0.0%)                | 1 (3.6%)                  | 1 (4.0%)                | 2 (2.5%)                |
| NDQ pre to follow-up                     |                         |                           |                         |                         |
| <i>M</i> ( <i>SD</i> , range, <i>N</i> ) | -7.15 (6.51, -25–2, 26) | -5.61 (7.85, -22–6, 27)   | -4.18 (6.90, -18–8, 22) | -5.73 (7.14, -25–8, 75) |
| Improved, <i>n</i> (%)                   | 13 (50.0%)              | 11 (40.7%)                | 8 (36.4%)               | 32 (42.7%)              |
| Unchanged, <i>n</i> (%)                  | 13 (50.0%)              | 16 (59.3%)                | 13 (59.1%)              | 42 (56.0%)              |
| Worsened, <i>n</i> (%)                   | 0 (0.0%)                | 0 (0.0%)                  | 1 (4.5%)                | 1 (1.3%)                |
| NFQ pre to post                          |                         |                           |                         |                         |
| <i>M</i> ( <i>SD</i> , range, <i>N</i> ) | -1.61 (3.10, -13–2, 28) | -1.04 (1.65, -4–2, 28)    | -0.79 (2.44, -9–3, 23)  | -1.17 (2.46, -13–3, 79) |
| Improved, <i>n</i> (%)                   | 4 (14.3%)               | 0 (0.0%)                  | 1 (4.3%)                | 5 (6.3%)                |
| Unchanged, <i>n</i> (%)                  | 24 (85.7%)              | 28 (100.0%)               | 22 (95.7%)              | 74 (93.7%)              |
| Worsened, <i>n</i> (%)                   | 0 (0.0%)                | 0 (0.0%)                  | 0 (0.0%)                | 0 (0.0%)                |
| NFQ pre to follow-up                     |                         |                           |                         |                         |
| <i>M</i> ( <i>SD</i> , range, <i>N</i> ) | -1.98 (3.12, -12–2, 25) | -1.65 (1.63, -6.25–1, 27) | -0.79 (1.60, -5–2, 19)  | -1.53 (2.29, -12–2, 71) |
| Improved, <i>n</i> (%)                   | 3 (12.0%)               | 1 (3.7%)                  | 1 (5.3%)                | 5 (7.0%)                |
| Unchanged, <i>n</i> (%)                  | 22 (88.0%)              | 26 (96.3%)                | 18 (94.7%)              | 66 (93.0%)              |
| Worsened, <i>n</i> (%)                   | 0 (0.0%)                | 0 (0.0%)                  | 0 (0.0%)                | 0 (0.0%)                |

| Change Score            | Condition                |                         |                          | Total                    |
|-------------------------|--------------------------|-------------------------|--------------------------|--------------------------|
|                         | IR                       | IE                      | PI                       |                          |
| NES pre to post         |                          |                         |                          |                          |
| <i>M (SD, range, N)</i> | -3.11 (6.34, -16–6, 28)  | -2.50 (6.88, -18–8, 28) | -1.88 (5.10, -10–13, 25) | -2.52 (6.13, -18–13, 81) |
| Improved, <i>n (%)</i>  | 7 (25.0%)                | 5 (17.9%)               | 2 (8.0%)                 | 14 (17.3%)               |
| Unchanged, <i>n (%)</i> | 21 (75.0%)               | 23 (82.1%)              | 22 (88.0%)               | 66 (81.5%)               |
| Worsened, <i>n (%)</i>  | 0 (0.0%)                 | 0 (0.0%)                | 1 (4.0%)                 | 1 (1.2%)                 |
| NES pre to follow-up    |                          |                         |                          |                          |
| <i>M (SD, range, N)</i> | -5.65 (8.71, -24–11, 26) | -6.78 (7.94, -26–2, 27) | -4.55 (7.08, -21–6, 22)  | -5.73 (7.93, -26–11, 75) |
| Improved, <i>n (%)</i>  | 11 (42.3%)               | 8 (29.6%)               | 6 (27.3%)                | 25 (33.3%)               |
| Unchanged, <i>n (%)</i> | 13 (50.0%)               | 19 (70.4%)              | 16 (72.7%)               | 48 (64.0%)               |
| Worsened, <i>n (%)</i>  | 2 (7.7%)                 | 0 (0.0%)                | 0 (0.0%)                 | 2 (2.7%)                 |
| SWE pre to post         |                          |                         |                          |                          |
| <i>M (SD, range, N)</i> | 1.33 (2.76, -4–9, 27)    | .78 (4.35, -9–15, 27)   | 0.48 (4.22, -9–15, 25)   | 0.87 (3.80, -9–15, 79)   |
| Improved, <i>n (%)</i>  | 2 (7.4%)                 | 2 (7.4%)                | 3 (12.0%)                | 7 (8.9%)                 |
| Unchanged, <i>n (%)</i> | 25 (92.6%)               | 23 (85.2%)              | 21 (84.0%)               | 69 (87.3%)               |
| Worsened, <i>n (%)</i>  | 0 (0.0%)                 | 2 (7.4%)                | 1 (4.0%)                 | 3 (3.8%)                 |
| SWE pre to follow-up    |                          |                         |                          |                          |
| <i>M (SD, range, N)</i> | 1.62 (3.03, -3–11, 26)   | 2.50 (5.67, -14–17, 28) | 0.82 (4.97, -8–17, 22)   | 1.71 (4.70, -14–17, 76)  |
| Improved, <i>n (%)</i>  | 4 (15.4%)                | 10 (35.7%)              | 3 (13.6%)                | 17 (22.4%)               |
| Unchanged, <i>n (%)</i> | 22 (84.6%)               | 16 (57.1%)              | 17 (77.3%)               | 55 (72.4%)               |
| Worsened, <i>n (%)</i>  | 0 (0.0%)                 | 2 (7.1%)                | 2 (9.1%)                 | 4 (5.3%)                 |

| Change Score            | Condition                   |                             |                              | Total                        |
|-------------------------|-----------------------------|-----------------------------|------------------------------|------------------------------|
|                         | IR                          | IE                          | PI                           |                              |
| SCL pre to post         |                             |                             |                              |                              |
| <i>M (SD, range, N)</i> | -.08 (0.23, -0.54–0.69, 26) | -.11 (0.23, -0.60–0.56, 28) | -0.05 (0.17, -0.47–0.27, 24) | -0.08 (0.21, -0.60–0.69, 78) |
| Improved, <i>n (%)</i>  | 6 (23.1%)                   | 9 (32.1%)                   | 4 (16.7%)                    | 19 (24.4%)                   |
| Unchanged, <i>n (%)</i> | 19 (73.1%)                  | 18 (64.3%)                  | 19 (79.2%)                   | 56 (71.8%)                   |
| Worsened, <i>n (%)</i>  | 1 (3.8%)                    | 1 (3.6%)                    | 1 (4.2%)                     | 3 (3.8%)                     |
| SCL pre to follow-up    |                             |                             |                              |                              |
| <i>M (SD, range, N)</i> | -.09 (0.32, -0.83–0.94, 25) | -.16 (0.38, -1.27–0.98, 28) | -0.04 (0.33, -0.46–1.06, 21) | -0.10 (0.35, -1.27–1.06, 74) |
| Improved, <i>n (%)</i>  | 6 (24.0%)                   | 13 (46.4%)                  | 5 (23.8%)                    | 24 (32.4%)                   |
| Unchanged, <i>n (%)</i> | 17 (68.0%)                  | 13 (46.4%)                  | 14 (66.7%)                   | 44 (59.5%)                   |
| Worsened, <i>n (%)</i>  | 2 (8.0%)                    | 2 (7.1%)                    | 2 (9.5%)                     | 6 (8.1%)                     |

*Note:* IE = Imaginal Exposure, IR = Imagery Rescripting, *M* = mean, NDQ = Nightmare Distress Questionnaire, NES = Nightmare Effects Survey, NFQ = Nightmare Frequency Questionnaire, PI = Positive Imagery, SCL = Symptom Checklist 90, *SD* = standard deviation, SWE = Self-Efficacy Questionnaire. Intention-to-treat sample, *N* = 96. Percentages refer to the number of observed values per measure, condition, and time.

**Table I:** Credibility, expectancy, and practice

| Measure                                                            | Condition              |                        |                        | Total                  |
|--------------------------------------------------------------------|------------------------|------------------------|------------------------|------------------------|
|                                                                    | IR                     | IE                     | PI                     |                        |
| Treatment credibility, <i>M</i> ( <i>SD</i> , <i>n</i> )           | 30.26 (4.82, 27)       | 29.00 (5.99, 30)       | 28.11 (6.67, 27)       | 29.12 (5.88, 84)       |
| Treatment expectancy, <i>M</i> ( <i>SD</i> , <i>n</i> )            | 14.30 (2.74, 27)       | 14.93 (4.00, 30)       | 14.26 (2.81, 27)       | 14.51 (3.24, 84)       |
| No. of practice sessions, <i>M</i> ( <i>SD</i> , range, <i>n</i> ) | 16.76 (6.42, 1–28, 25) | 13.54 (9.48, 0–28, 26) | 21.23 (6.61, 1–28, 22) | 16.96 (8.22, 0–28, 73) |

*Note:* IE = Imaginal Exposure, IR = Imagery Rescripting, *M* = mean, *nm* = nightmare, PI = Positive Imagery, *SD* = standard deviation. Intention-to-treat sample, *N* = 96.
